# Supplementary material for: Inflammation and fibrosis in Crohn’s disease: location-matched histological correlation of small bowel ultrasound features
Source: PubMed Central journal article supplement (PMC7864849; doi:10.1007/s00261-020-02603-6), 2020-06-20

# METRIC

## Ultrasound Imaging Key

Scoring guide to be used in conjunction with ultrasound CRF pictorial definitions.

| Bowel wall thickness |                |
|----------------------|----------------|
| Score                |                |
| 0                    | 0-3mm - Normal |
| 1                    | 3-6mm          |
| 2                    | 6-9mm          |
| 3                    | >9mm           |

| Functional obstruction = Upstream dilatation |         |
|----------------------------------------------|---------|
| Score                                        |         |
| 0                                            | None    |
| 1                                            | Present |

| Mesenteric fat echogenicity |                                                                                                                                                                                              |
|-----------------------------|----------------------------------------------------------------------------------------------------------------------------------------------------------------------------------------------|
| Score                       |                                                                                                                                                                                              |
| 0                           | Normal                                                                                                                                                                                       |
| 1                           | Focal hyperechoic without fat wrap (i.e. focal defined area of mesenteric fat of increased echogenicity without overall increase in volume of peri mural fat)                                |
| 2                           | Focal hyperechoic with fat wrap (i.e. focal defined area of mesenteric fat of increased echogenicity with overall increase in volume of peri mural fat)                                      |
| 3                           | Stratified heterogeneous with fat expansion (chronic disease) - overall increase in volume of peri mural fat with maintained normal mesenteric stratification and no focal hyperechoic area) |
| 4                           | Uniform hypoechoic (i.e. mesenteric fat of decreased echogenicity)                                                                                                                           |

# METRIC

## Anti-mesenteric border

### Score

|   |                                                                         |
|---|-------------------------------------------------------------------------|
| 0 | Well defined (smooth interface between bowel wall and mesenteric fat)   |
| 1 | Ill defined (irregular Interface between bowel wall and mesenteric fat) |

## Mesenteric border

### Score

|   |                                                                                             |
|---|---------------------------------------------------------------------------------------------|
| 0 | Well defined (smooth interface between bowel wall and mesenteric fat)                       |
| 1 | Generally ill defined (generally irregular Interface between bowel wall and mesenteric fat) |
| 2 | Focally ill defined (focal irregular Interface between bowel wall and mesenteric fat)       |

## Submucosal layer thickness

### Score

|   |                                                                                           |
|---|-------------------------------------------------------------------------------------------|
| 0 | Normal                                                                                    |
| 1 | Thickened (increased thickness compared to submucosa of normal bowel in the same patient) |

## Submucosal layer echogenicity

### Score

|   |                                                                                                                 |
|---|-----------------------------------------------------------------------------------------------------------------|
| 0 | Normal                                                                                                          |
| 1 | Reduced (echogenicity lower than normal bowel in same patient)                                                  |
| 2 | Uniform increased (echogenicity greater than normal bowel in same patient)                                      |
| 3 | Increased with bands (echogenicity greater than normal bowel in same patient with spoke wheel hypoechoic bands) |

# METRIC

| Submucosal layer clarity |                                                                                  |
|--------------------------|----------------------------------------------------------------------------------|
| Score                    |                                                                                  |
| 0                        | Normal - well defined (smooth interface between submucosa and other wall layers) |
| 1                        | Ill defined (irregular interface between submucosa and other wall layers)        |

| Mucosal layer |                                                                                                 |
|---------------|-------------------------------------------------------------------------------------------------|
| Score         |                                                                                                 |
| 0             | Normal - well defined                                                                           |
| 1             | Isolated thickened (increased thickness compared to mucosa of normal bowel in the same patient) |
| 2             | Thickened also in presence of submucosal thickening                                             |

| Ulceration |                                  |
|------------|----------------------------------|
| Score      |                                  |
| 0          | None                             |
| 1          | Superficial-< 50% wall thickness |
| 2          | Deep-≥50% wall thickness         |

# METRIC

## Doppler vascular pattern imaged in axial section

Score

|   |                                                                                                                                                              |
|---|--------------------------------------------------------------------------------------------------------------------------------------------------------------|
| 0 | Normal                                                                                                                                                       |
| 1 | Increased focal (increased Doppler signal isolated to less than half the circumference on a trans-axial image) compared to normal bowel in the same patient) |
| 2 | Increased generalised (increased Doppler signal affecting more half the circumference on a trans-axial image compared to normal bowel in the same patient)   |

## Peristalsis related to stricturing

Score

|   |                                                            |
|---|------------------------------------------------------------|
| 0 | Distension of the segment during peristaltic wave          |
| 1 | Non distension of segment during proximal peristaltic wave |

## Disease activity

At least one of: wall thickening/ focal hyperechoic mesentery (with or without fat wrap)/ isolated mucosal thickening /ill defined submucosal layer/ ill defined anti-mesenteric border/ Increased Doppler vascular pattern/ulceration/abscess

## Segmental disease severity assessment

Score

|   |                                                                                                                                      |
|---|--------------------------------------------------------------------------------------------------------------------------------------|
| 0 | None                                                                                                                                 |
| 1 | Early-superficial ulceration and/or mild wall thickening/ mild increased vascularity                                                 |
| 2 | Advanced-transmural disease and/or fistulation and/or stricturing and/or cobblestoning/ and or wall oedema or significant thickening |

# METRIC

Lymphadenopathy (all measurements in short axis)

| Score |                                  |
|-------|----------------------------------|
| 0     | None                             |
| 1     | Cluster all less than 1cm        |
| 2     | 1 or 2 nodes > 1cm               |
| 3     | 3 or more nodes greater than 1cm |

# METRIC

## Ultrasound Imaging Key

### Mesenteric Fat Echogenicity

0 - Normal

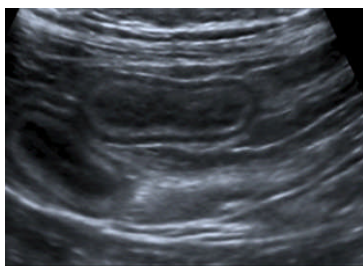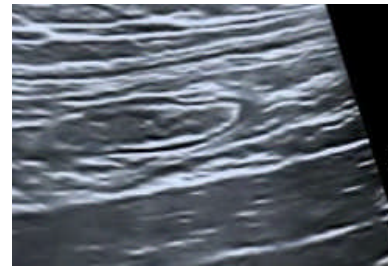

1 - Focal hyperechoic without fat wrap (i.e. focal defined area of mesenteric fat of increased echogenicity without overall increase in volume of peri mural fat)

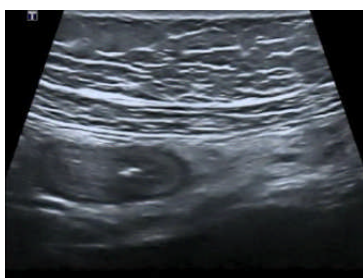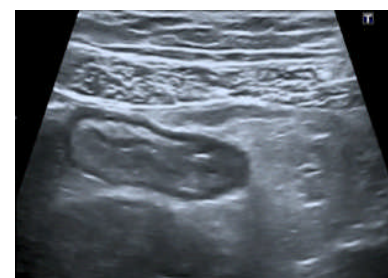

2 - Focal hyperechoic with fat wrap (i.e. focal defined area of mesenteric fat of increased echogenicity with overall increase in volume of peri mural fat)

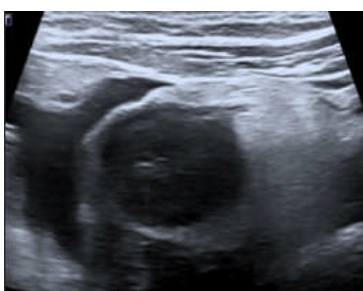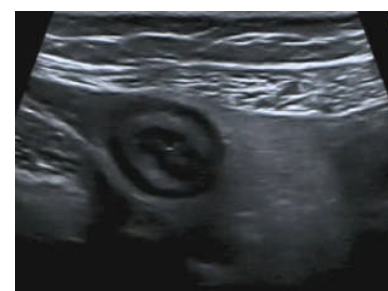

3 - Stratified heterogeneous with fat expansion (chronic disease) - overall increase in volume of peri mural fat with maintained normal mesenteric stratification and no focal hyperechoic area)

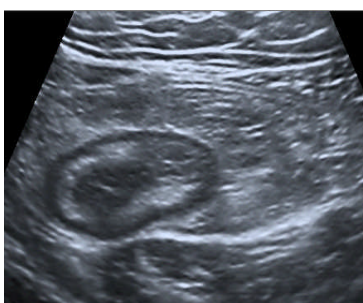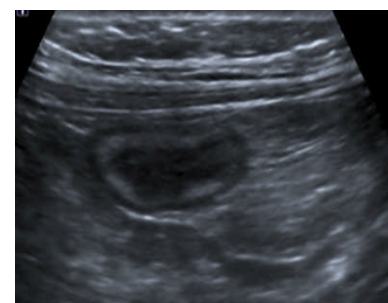

4 - Uniform hypoechoic (i.e. mesenteric fat of decreased echogenicity)

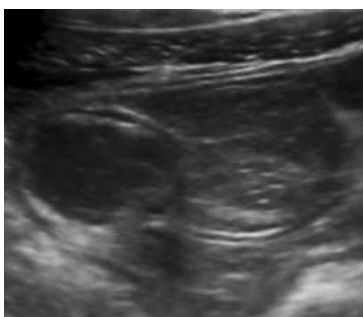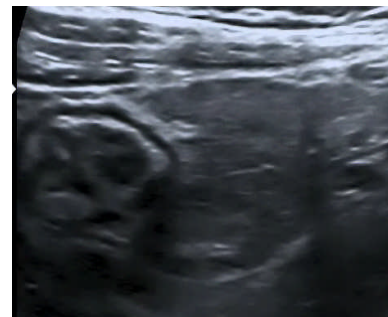

# METRIC

## Ultrasound Imaging Key

### Anti-Mesenteric Border

#### Example 1

0 - Well defined  
(smooth  
interface  
between bowel  
wall and  
mesenteric fat)

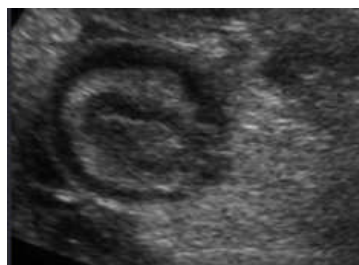

Post  
treatment

1 - Ill defined  
(irregular  
Interface  
between bowel  
wall and  
mesenteric fat)

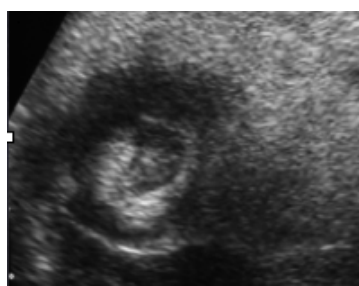

Pre  
treatment

#### Example 2

0 - Well defined  
(smooth  
interface  
between bowel  
wall and  
mesenteric fat)

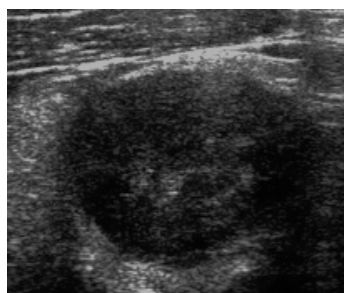

Post  
treatment

1 - Ill defined  
(irregular  
Interface  
between bowel  
wall and  
mesenteric fat)

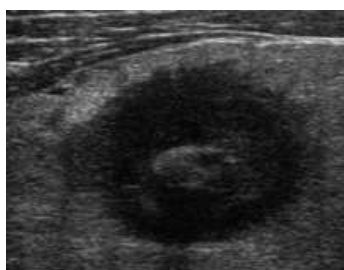

Pre  
treatment

# METRIC

## Ultrasound Imaging Key

### Mesenteric Border

0 - Well defined

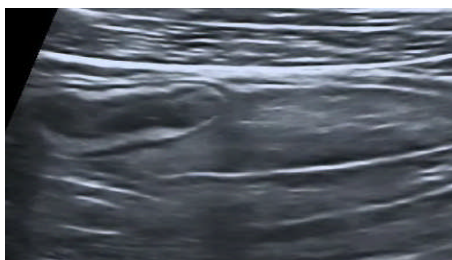

1 - Ill defined

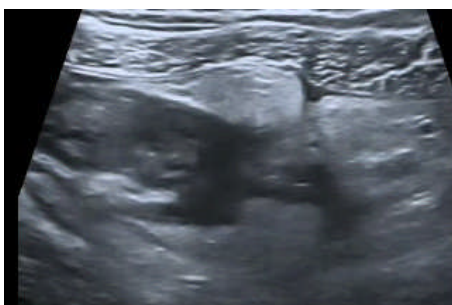

2 - Focal involvement

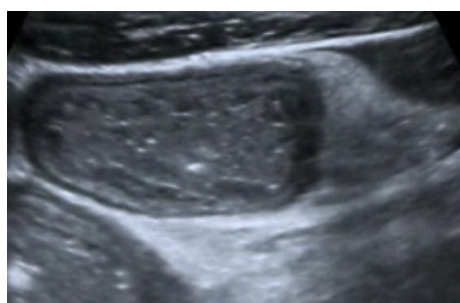

### Submucosal layer thickness

0 - Normal

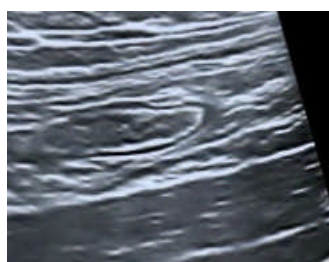

### Ileostomy

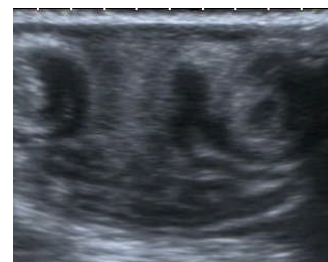

1 - Thickened  
(increased thickness compared to submucosa of normal bowel in the same patient)

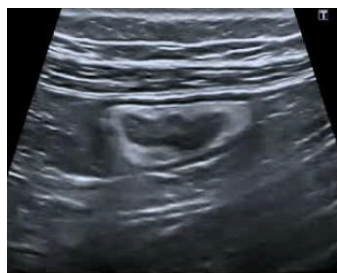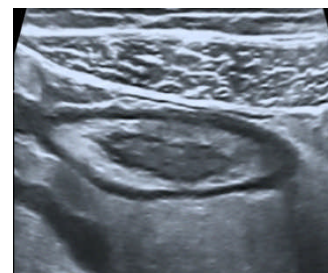



# METRIC

## Ultrasound Imaging Key

Sub-mucosal layer echogenicity

0 - Normal

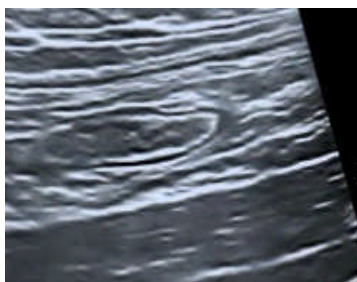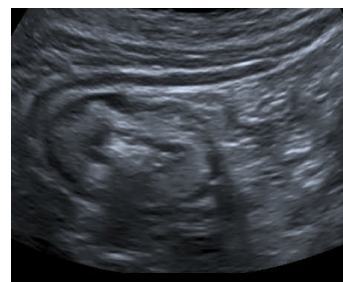

1 - Reduced  
(echogenicity lower than normal bowel in same patient)

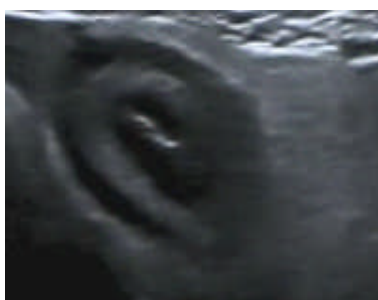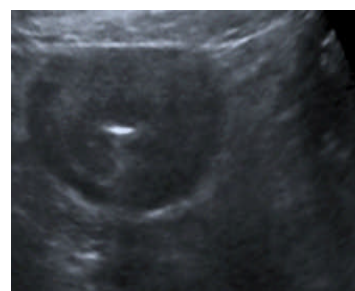

2 - Uniform increased  
(echogenicity greater than normal bowel in same patient)

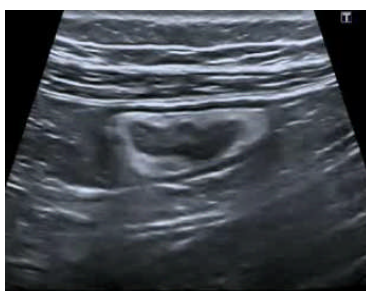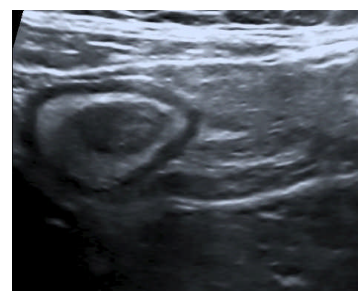

3 - Increased with bands  
(echogenicity greater than normal bowel in same patient with spoke wheel hypoechoic bands)

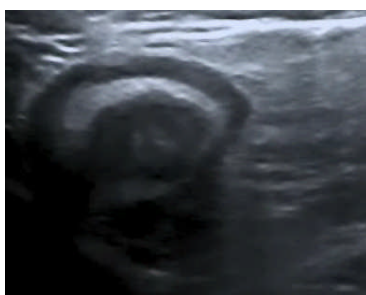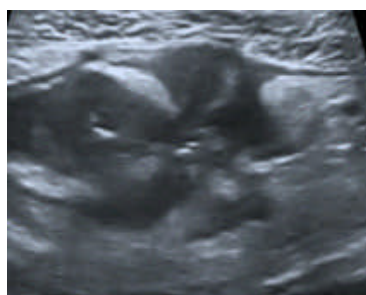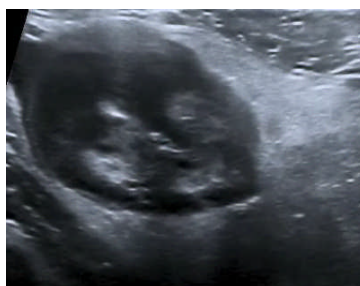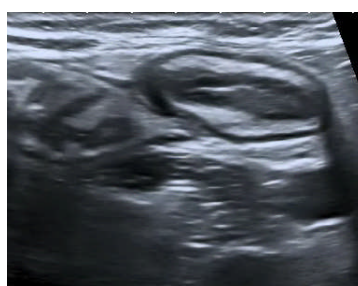

# METRIC

## Ultrasound Imaging Key

### Sub-mucosal Layer Clarity

0 - Normal well defined  
(smooth interface between submucosa and other wall layers)

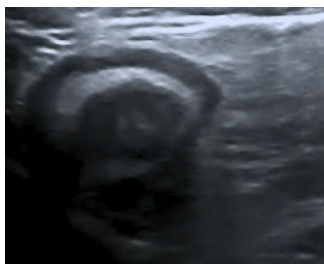

1 - Ill defined (irregular interface between submucosa and other wall layers)

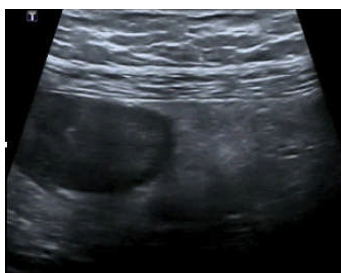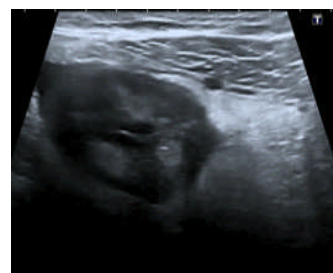

### Mucosal layer

0 - Normal, well defined

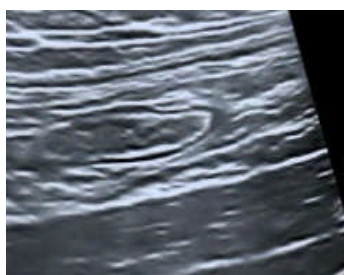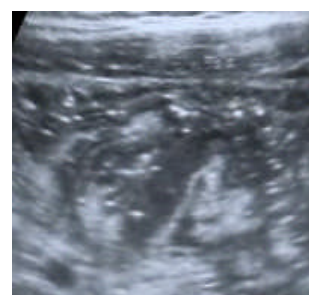

ileocaecal  
valve  
ulceration

1 - Isolated thickened  
(increased thickness compared to mucosa of normal bowel in the same patient)

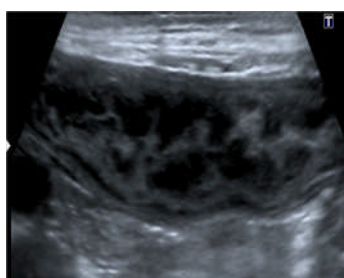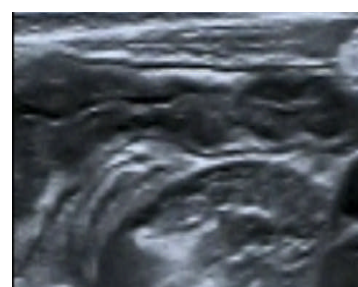

2 - Thickened also in the presence of submucosal thickening

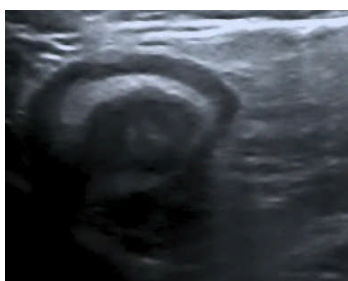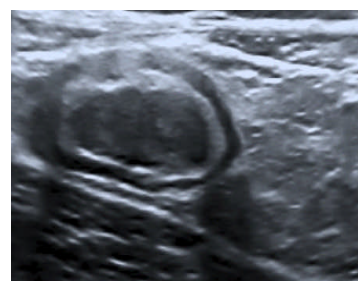

# METRIC

## Ultrasound Imaging Key

### Doppler Vascular Pattern Imaging In Axial Section

0 - Normal

1 - Increased focal  
(increased Doppler signal isolated to less than half the circumference on a trans-axial image) compared to normal bowel in the same patient)

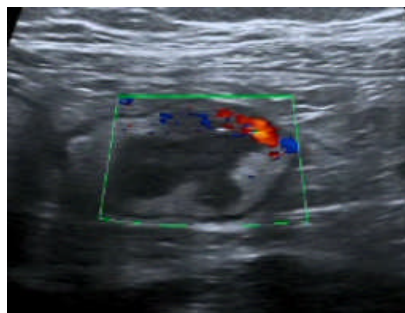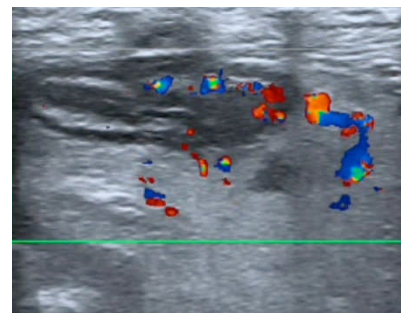

2 - Increased generalised  
(increased Doppler signal affecting more than half the circumference on a trans-axial image compared to normal bowel in the same patient)

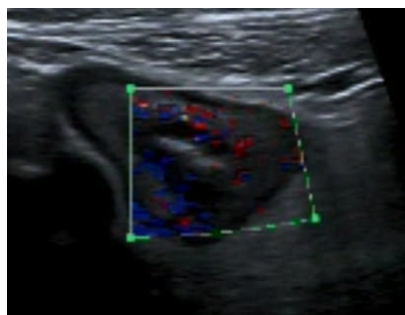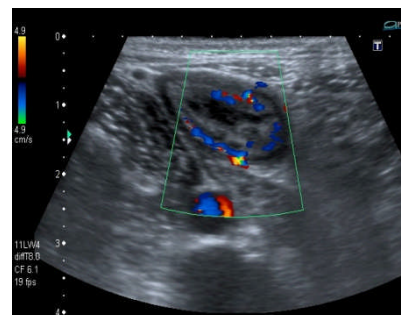

### Ulceration

0-Normal

1-Superficial-< 50%  
wall thickness

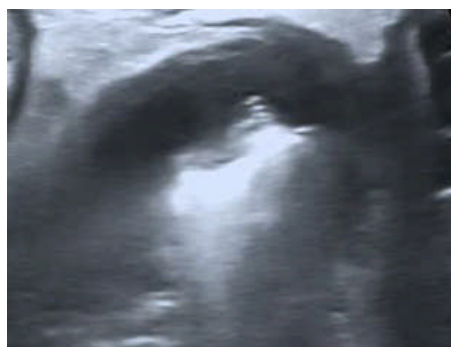

2-Deep-≥50% wall  
thickness

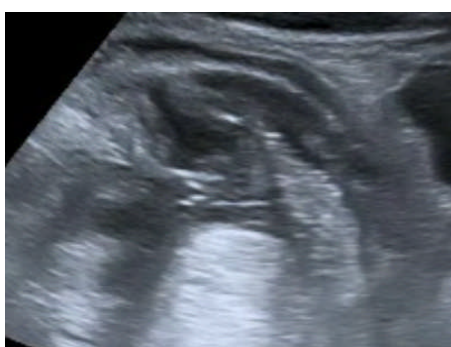

# METRIC

## Ultrasound Imaging Key

Functional obstruction = upstream dilatation

Lymphadenopathy

0=none. 1=cluster all less than 1cm. 2=cluster 1 or 2 nodes >1cm. 3=3 or more nodes greater than 1cm

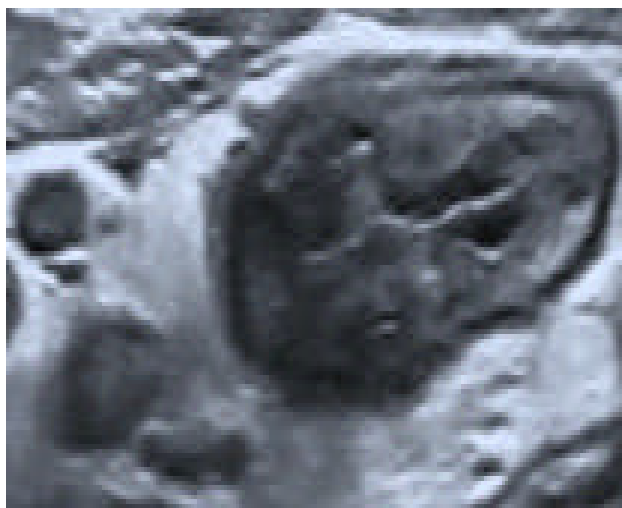

Supplement: 261_2020_2603_MOESM2_ESM.pdf [file 261_2020_2603_MOESM2_ESM.pdf]
